# Supplementary material for: LLM-CD: A Cognitive Diagnosis Framework for Large Language Models(LLMs) ——Experimental Research Based on Green and Low-Carbon Knowledge
Source: Research Square preprint supplement (doi:10.21203/rs.3.rs-6350858/v1), 2025-06-19
Supplement: Supplementary file 1 [file 89a1a0cfcc71375e236bf400.docx]

# APPENDIX

TABLE 6 Cognitive Diagnosis Q Matrix

| Item | A1 | A2 | A3 | A4 | A5 | A6 | A7 | A8 | A9 | A10 |
| --- | --- | --- | --- | --- | --- | --- | --- | --- | --- | --- |
| item1 | 1 | 0 | 0 | 0 | 0 | 0 | 0 | 0 | 1 | 0 |
| item2 | 1 | 0 | 0 | 0 | 0 | 1 | 0 | 0 | 0 | 0 |
| item3 | 0 | 1 | 1 | 0 | 1 | 0 | 0 | 0 | 0 | 0 |
| item4 | 0 | 0 | 0 | 1 | 0 | 0 | 0 | 1 | 0 | 0 |
| item5 | 1 | 0 | 0 | 0 | 0 | 1 | 0 | 0 | 0 | 0 |
| item6 | 1 | 0 | 0 | 0 | 1 | 1 | 0 | 0 | 0 | 0 |
| item7 | 0 | 0 | 1 | 1 | 0 | 0 | 0 | 0 | 0 | 0 |
| item8 | 1 | 1 | 1 | 0 | 0 | 0 | 0 | 0 | 0 | 0 |
| item9 | 0 | 1 | 0 | 0 | 1 | 0 | 0 | 0 | 0 | 1 |
| item10 | 0 | 1 | 1 | 0 | 0 | 0 | 0 | 0 | 0 | 0 |
| item11 | 0 | 1 | 0 | 1 | 1 | 0 | 0 | 0 | 0 | 1 |
| item12 | 0 | 0 | 0 | 1 | 0 | 0 | 0 | 1 | 0 | 0 |
| item13 | 0 | 0 | 0 | 1 | 1 | 0 | 0 | 0 | 0 | 0 |
| item14 | 1 | 0 | 0 | 0 | 1 | 0 | 0 | 0 | 1 | 0 |
| item15 | 0 | 0 | 0 | 0 | 1 | 0 | 0 | 0 | 1 | 0 |
| item16 | 0 | 1 | 1 | 0 | 0 | 0 | 0 | 0 | 0 | 0 |
| item17 | 1 | 0 | 0 | 0 | 0 | 1 | 0 | 0 | 0 | 0 |
| item18 | 1 | 0 | 1 | 1 | 0 | 0 | 0 | 1 | 0 | 0 |
| item19 | 1 | 0 | 0 | 1 | 1 | 1 | 0 | 0 | 0 | 0 |
| item20 | 1 | 0 | 0 | 0 | 1 | 1 | 0 | 0 | 0 | 0 |
| item21 | 0 | 0 | 0 | 1 | 0 | 0 | 1 | 0 | 0 | 0 |
| item22 | 1 | 0 | 0 | 0 | 0 | 1 | 0 | 0 | 0 | 0 |
| item23 | 1 | 0 | 0 | 0 | 1 | 0 | 1 | 0 | 0 | 0 |
| item24 | 1 | 0 | 0 | 0 | 1 | 0 | 1 | 0 | 0 | 0 |
| item25 | 0 | 0 | 0 | 1 | 0 | 0 | 0 | 1 | 0 | 0 |
| item26 | 1 | 0 | 0 | 0 | 1 | 1 | 0 | 0 | 0 | 0 |
| item27 | 1 | 0 | 0 | 0 | 0 | 1 | 0 | 0 | 1 | 0 |
| item28 | 0 | 0 | 0 | 0 | 1 | 0 | 0 | 0 | 1 | 0 |
| item29 | 0 | 0 | 0 | 0 | 1 | 0 | 0 | 0 | 1 | 0 |

TABLE 7 Role Extraction Results

| Categories | Roles |
| --- | --- |
| Government & Policy Development  (GPD) | National Development and Reform Commission (NDRC), National Energy Administration (NEA), Environmental Protection Department (EPD), Traffic Management Department (TMD), Urban Planning Bureau (UPB), Agriculture Department (AD), Water Resources Department (WRD), Forestry Department (FD), Commerce Department (CD), Education Department (ED), Science and Technology Department (S&T), Finance Department (FD), Taxation Department (TD), Legislative Affairs Office (LAO), Policy Research Centre (PRC), |
| Business & Production  (BP) | Green Building Material Manufacturers,Organic Food Manufacturers,Renewable Energy Development Companies,Green Energy Suppliers,Eco-friendly Product Design Companies,Green Logistics Service Providers,Eco-friendly Packaging Material Manufacturers,Eco-friendly Equipment Manufacturers,Green Chemical Enterprises,Eco-friendly Automobile Manufacturers,Green Home Appliances Manufacturers,Eco-friendly Clothing Brands,Eco-friendly Stationery Supplier,Green Electronic Product Manufacturers,Eco-friendly Furniture Manufacturers, |
| Education & Training  (ET) | Environmental science departments in universities,environmental education teachers in primary and secondary schools,environmental vocational training schools,environmental protection research institutes,environmental online education platforms,environmental knowledge popularisation organisations,environmental technology training centres,environmental awareness workshops,environmental volunteer training programmes,environmental skills competition organisers, |
| Communities & Individuals  (CI) | Community environmental organisations,residential property management,community event planners,environmental volunteers,environmental consumers,housewives/husbands,environmental journalists,environmental bloggers,environmental forum moderators,environmental opinion leaders, |
| Media & Communication  (MC) | TV environmental programme hosts,radio environmental programme editors,newspaper environmental columnists,environmental video producers,environmental advertising creative teams,environmental social media operators,environmental news photographers,environmental film directors,environmental public service advertisement designers,environmental brochure designers, |
| Finance & Economics  (FE) | Green fund manager,environmental banker,green credit expert,environmental insurance consultant,carbon trading broker,environmental investment analyst,green securities analyst,environmental financial consultant,environmental auditor,environmental economist, |
| Legal & Compliance  (LC) | Environmental law firm,environmental legal advisor,environmental regulation researcher,environmental policy analyst,environmental compliance officer,environmental litigation attorney,environmental contract examiner,environmental risk manager,environmental compliance trainer,environmental intellectual property expert, |
| Research & Innovation  (RI) | Environmental Science Laboratory,Environmental Technology R&D Centre,Environmental New Material Research Institute,Environmental Process Improvement Team,Environmental Data Analysis Centre,Environmental Technology Transformation Platform,Environmental Research Project Management,Environmental Technology Innovation Incubator,Environmental Technology Assessment Agency,Environmental Technology International Exchange Centre, |
| International Co-operation  (IC) | Representatives of international environmental protection organisations,international environmental protection conference organisers,international environmental protection project coordinators,international environmental protection technology introduction experts,international environmental protection fund application specialists,international environmental protection standard certification consultants,international environmental protection cooperation agreement negotiators,international environmental protection information exchange specialists,international environmental protection education and exchange personnel,international environmental protection network platform operators, |

TABLE 8 Cognitive Diagnosis Result Matrix A

TABLE 9 Parameter Estimation Results of the DINA Model
